# Supplementary material for: Comparison of complex networks and tree-based methods of phylogenetic analysis and proposal of a bootstrap method
Source: PeerJ journal article supplement (doi:10.7717/peerj.4349), 2018-02-09
Supplement: SF1_(a-g).pdf [file SF1_%28a-g%29.pdf]

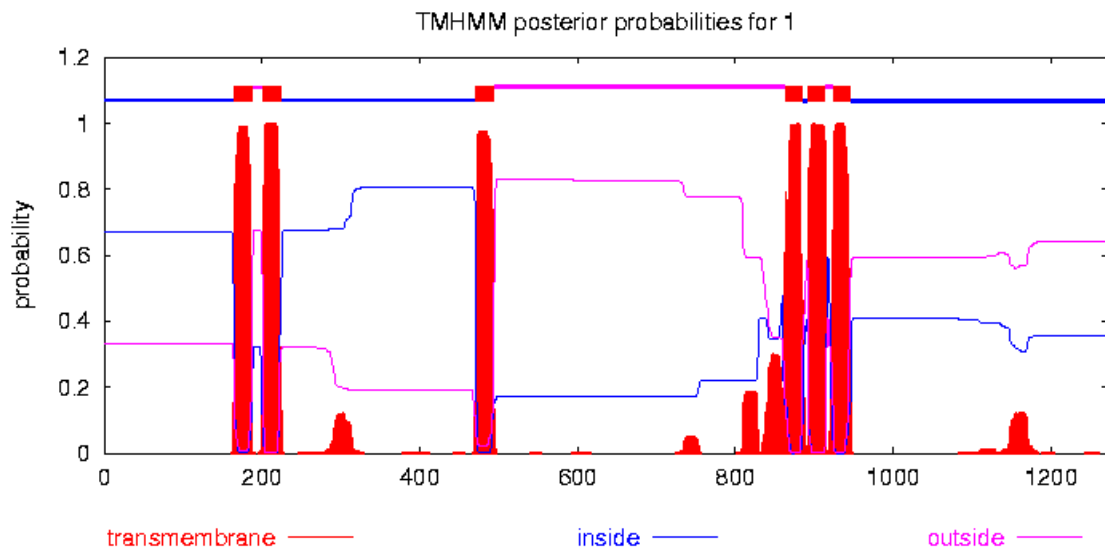

SF1 a: Profile 1 of transmembrane topological organization of complete sequences of protein of CHSBasidio database.

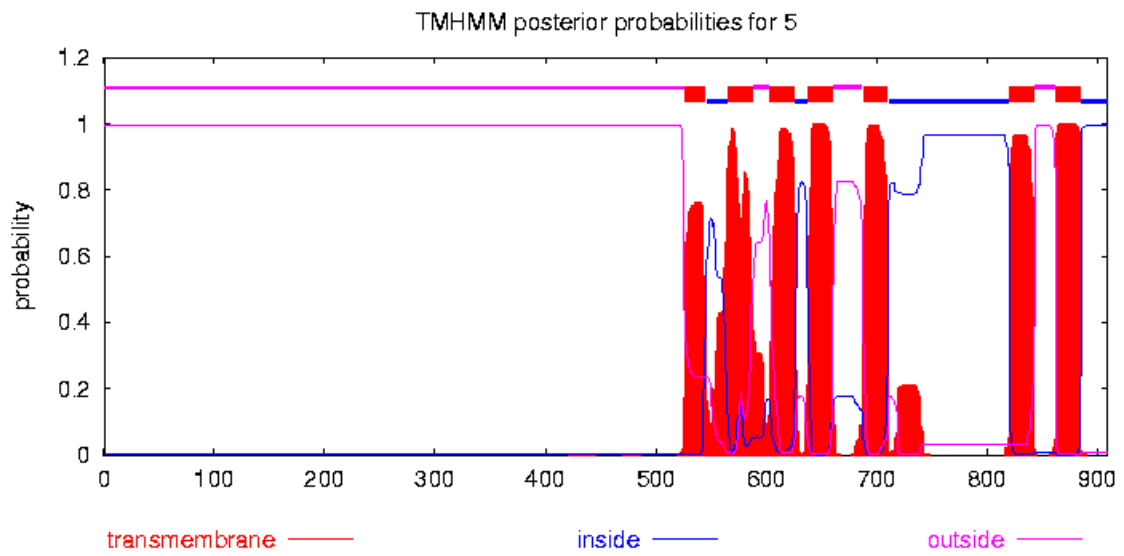

SF1 b: Profile 2 of transmembrane topological organization of complete sequences of protein of CHSBasidio database.

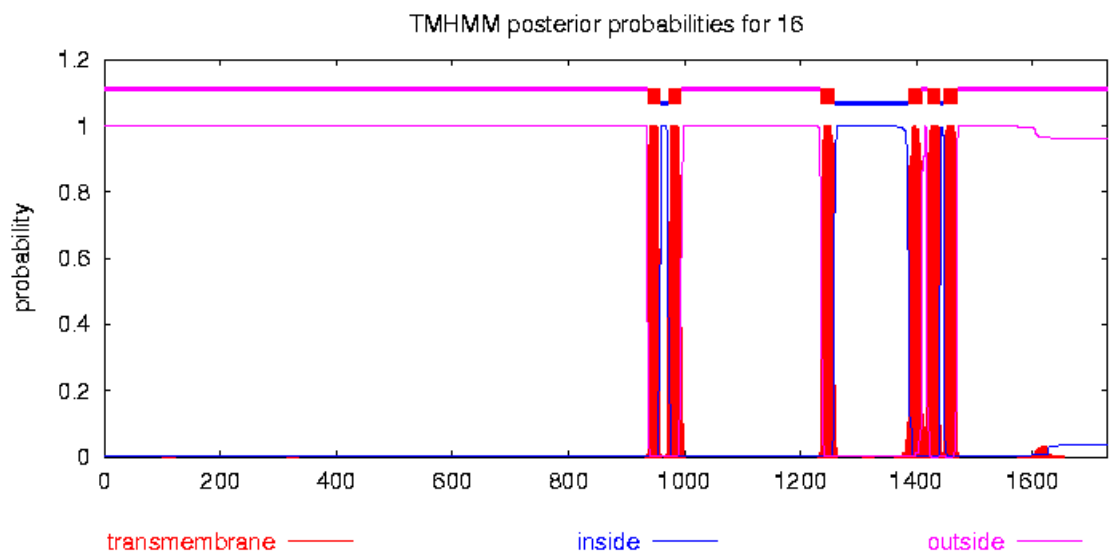

SF1 c: Profile 3 of transmembrane topological organization of complete sequences of protein of CHSBasidio database.

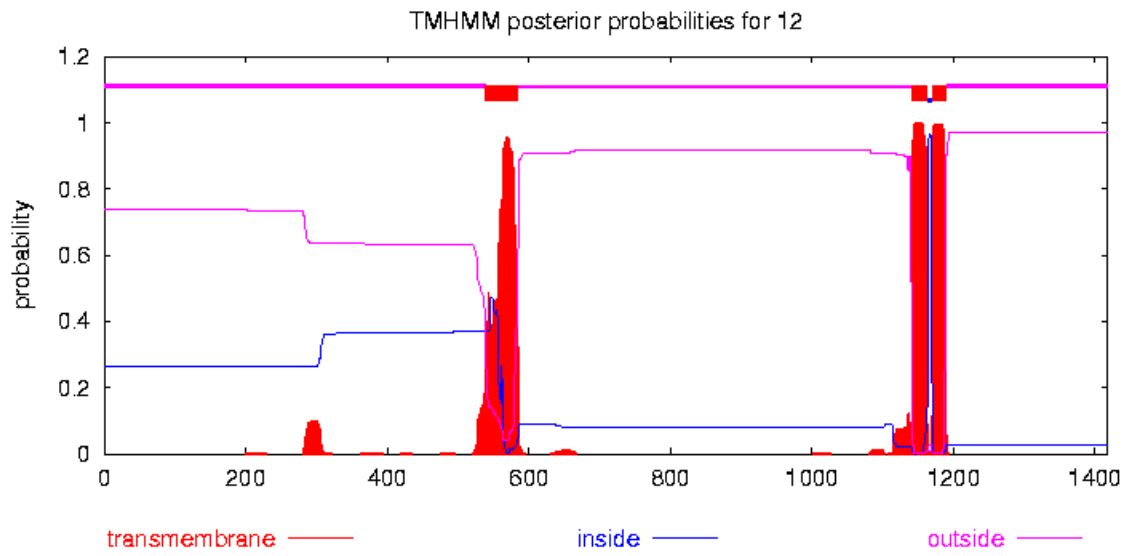

SF1 d: Profile 4 of transmembrane topological organization of complete sequences of protein of CHSBasidio database.

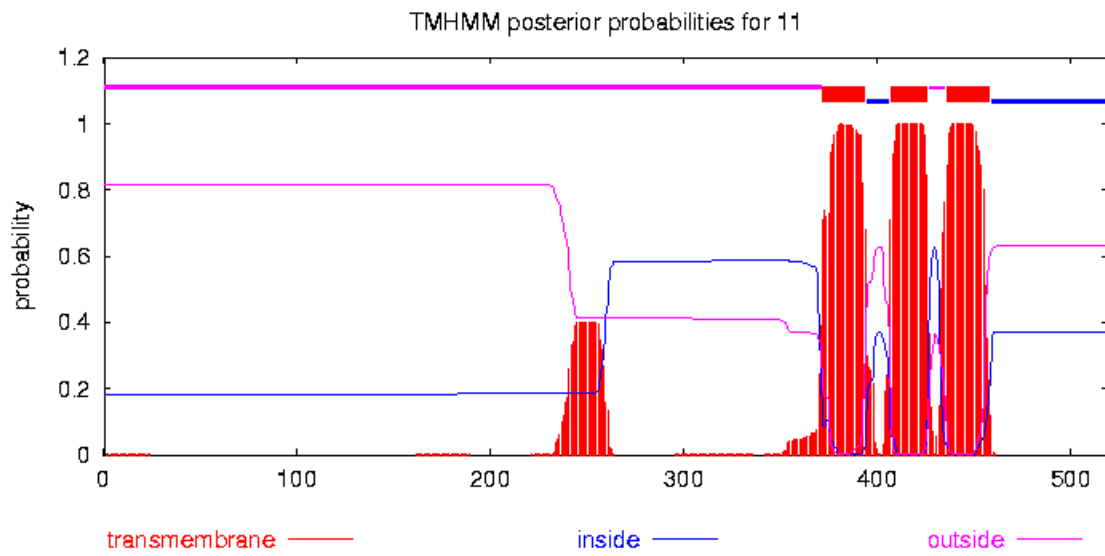

SF1 e: Profile 5 of transmembrane topological organization of complete sequences of protein of CHSBasidio database.

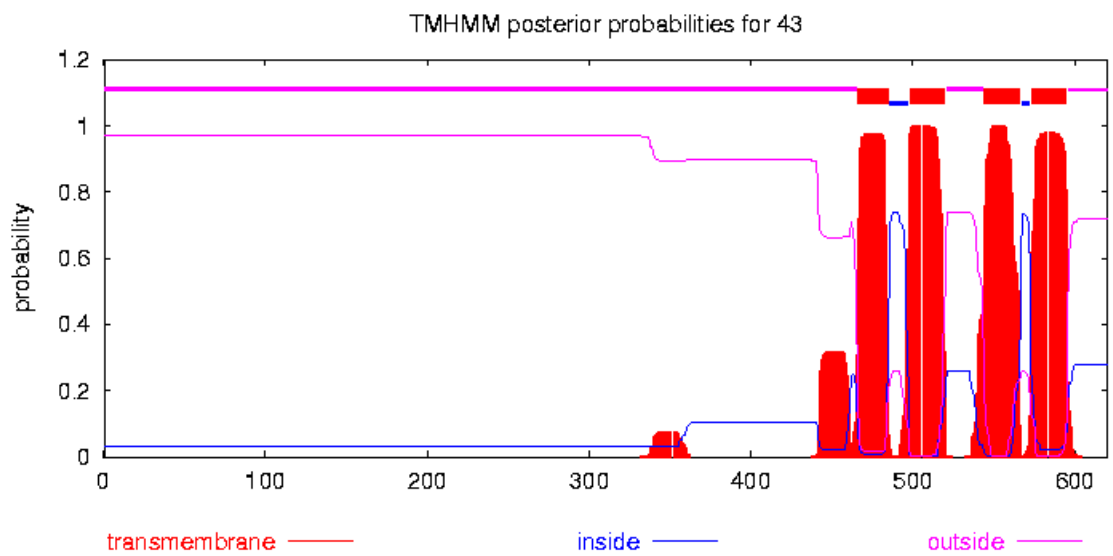

SF1 f: Profile 6 of transmembrane topological organization of complete sequences of protein of CHSBasidio database.

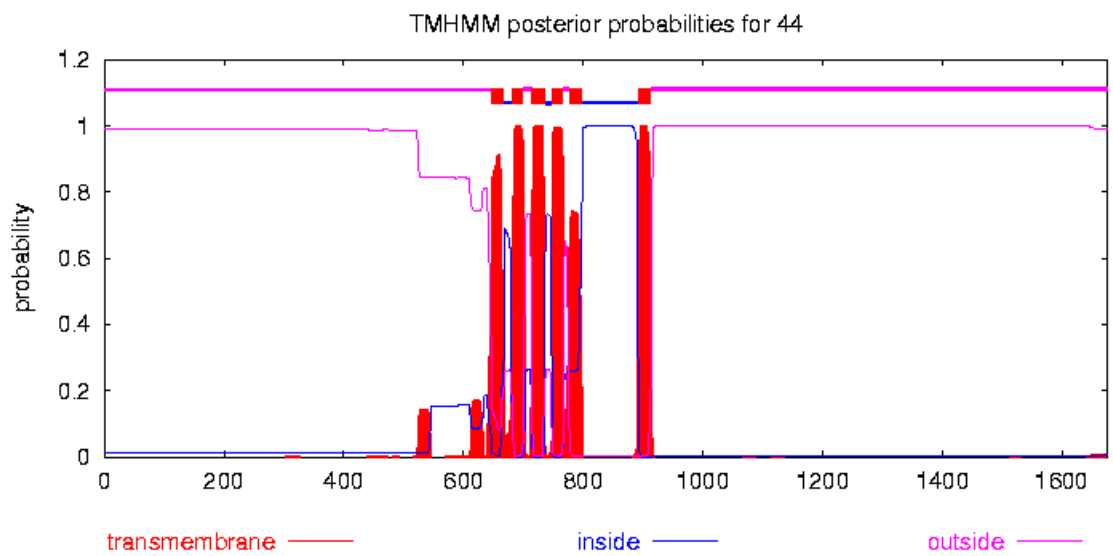

SF1 g: Profile 7 of transmembrane topological organization of complete sequences of protein of CHSBasidio database.
